# Supplementary material
Source: HighWire-hosted journal article supplement (https://ajnr-sso.highwirestaging.com/highwire/filestream/99525/field_highwire_adjunct_files/0/0147.pdf)
Supplement: 0147.pdf [file 0147.pdf]

## Supplemental Data

|                                                                                                                                                                                   |            |
|-----------------------------------------------------------------------------------------------------------------------------------------------------------------------------------|------------|
| <b>Supplemental Figures:</b>                                                                                                                                                      |            |
| - <b>Supplemental Figure I:</b> Rates of vessel perforation per year in our comprehensive stroke center.                                                                          | <b>2</b>   |
| - <b>Supplemental Figure II:</b> PRISMA Diagram                                                                                                                                   | <b>3</b>   |
| <b>Supplemental Tables:</b>                                                                                                                                                       |            |
| - <b>Supplemental Table I:</b> Baseline characteristics and outcomes for all patients and according to reperfusion status. Values are presented as n(%), mean±SD or median [IQR]. | <b>4-5</b> |
| - <b>Supplemental Table II:</b> Description and outcomes of 29 patients for whom complete angiographic studies were available                                                     | <b>6</b>   |
| - <b>Supplemental Table III:</b> Results of systematic review                                                                                                                     | <b>7-8</b> |

**Supplemental Figure I:** Rates of vessel perforation per year in our comprehensive stroke center.

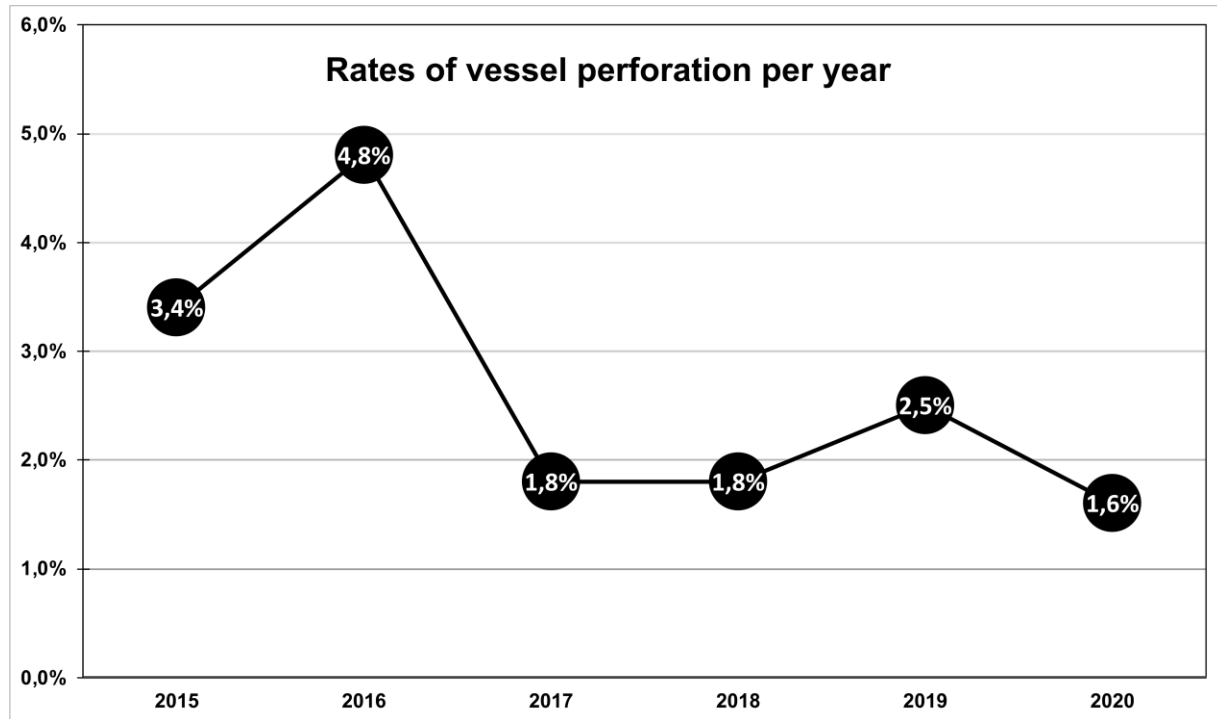

**Supplemental Figure II: PRISMA Diagram**

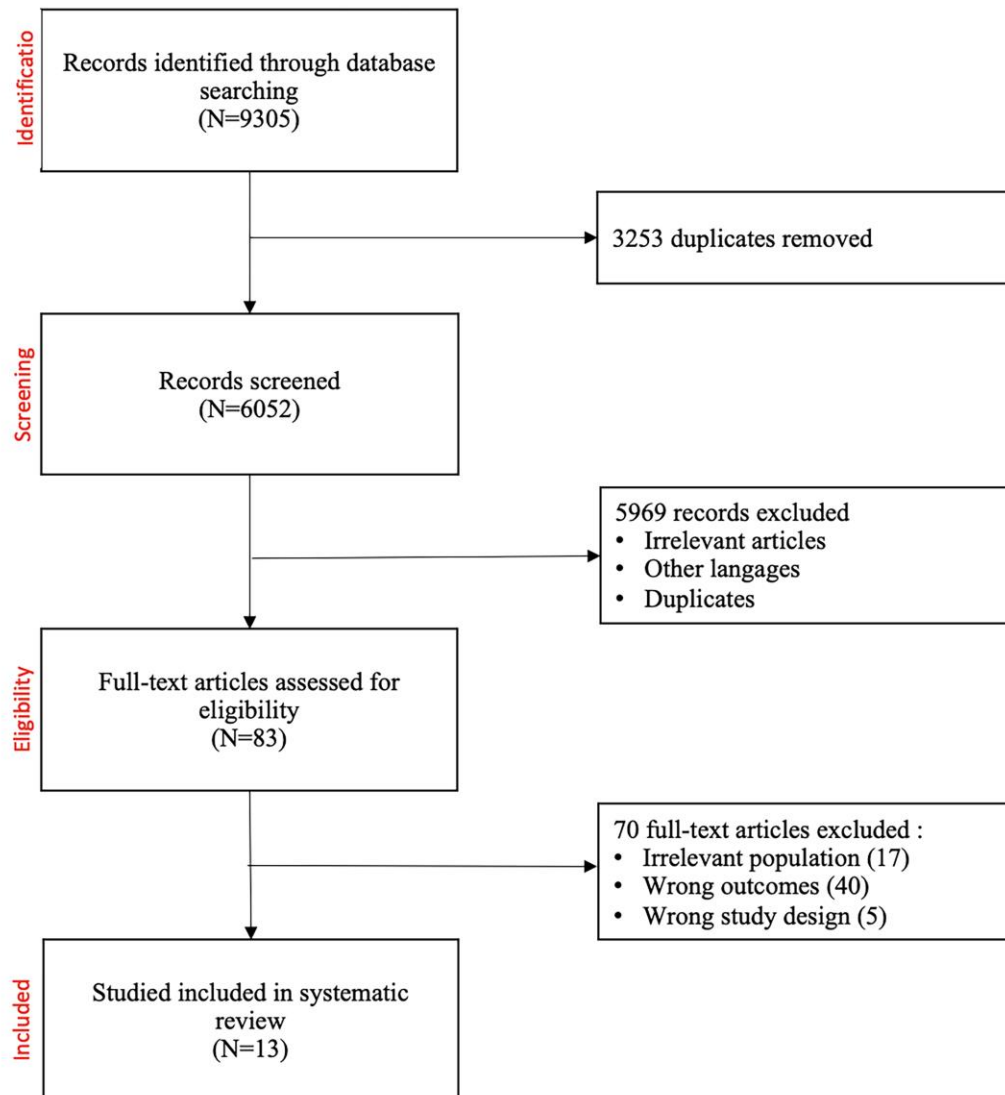

**Supplemental Table I:** Baseline characteristics and outcomes for all patients and according to reperfusion status. Values are presented as n(%), mean±SD or median [IQR].

| Characteristics                                 | All patients<br>N=32 | mTICI < 2b<br>N = 16 | mTICI ≥ 2b<br>N= 16  | P<br>value |
|-------------------------------------------------|----------------------|----------------------|----------------------|------------|
| <b>Female sex</b>                               | 16 (50)              | 7 (43.8)             | 9 (56.3)             | 0.6        |
| <b>Age</b>                                      | 67.0±14.2            | 68.9±14.6            | 65.2±14.0            | 0.6        |
| <b>Past medical history</b>                     |                      |                      |                      |            |
| <b>Hypertension</b>                             | 17 (53.1)            | 12 (75.0)            | 5 (31.3)             | 0.019      |
| <b>Dyslipidemia</b>                             | 14 (43.8)            | 7 (43.8)             | 7 (43.8)             | 0.8        |
| <b>Type 2 diabetes</b>                          | 6 (18.8)             | 4 (25.0)             | 2 (12.5)             | 0.6        |
| <b>Active smoking</b>                           | 8 (25.0)             | 4 (25.0)             | 4 (25.0)             | 0.9        |
| <b>Coronary artery disease</b>                  | 7 (21.9)             | 4 (25.0)             | 3 (18.8)             | 0.6        |
| <b>Previous Stroke or TIA</b>                   | 5 (15.6)             | 2 (12.5)             | 3 (18.8)             | 0.7        |
| <b>Previous antithrombotic medications</b>      | 11 (34.4)            | 5 (31.3)             | 6 (37.5)             | 0.8        |
| <b>Current stroke event</b>                     |                      |                      |                      |            |
| <b>Initial NIHSS</b>                            | 19.5 [15 – 24.8]     | 19.5 [15.8 – 23.4]   | 19 [13.8 - 25]       | 0.8        |
| <b>Site of occlusion</b>                        |                      |                      |                      | 0.6        |
| ICA                                             | 10 (31.3)            | 6 (37.5)             | 4 (25.0)             |            |
| M1 or M2                                        | 22 (68.8)            | 10 (62.5)            | 12 (75.0)            |            |
| <b>ASPECTS</b>                                  | 9 [8 – 10]           | 9 [8 – 10]           | 9 [8 – 9.5]          | 0.7        |
| <b>IV Thrombolysis</b>                          | 19 (59.4)            | 9 (56.3)             | 10 (62.5)            | 0.9        |
| <b>Door to needle (min)</b>                     | 39.5 [27.3 – 70.3]   | 45.7 [32.1 – 82.6]   | 36.0 [27.2 – 68.1]   | 0.5        |
| <b>Door to groin puncture (min)</b>             | 125.9 [58.1 – 175.2] | 128.3 [78.0 – 176.7] | 123.5 [58.1 – 162.1] | 0.7        |
| <b>Door to end of procedure (min)</b>           | 185 [110 -248]       | 200 [122 – 258]      | 165 [81 – 224]       | 0.4        |
| <b>Groin puncture to end of procedure (min)</b> | 55 [35.5 – 77.5]     | 73 [56 – 100]        | 41 [23 – 53]         | 0.001      |
| <b>Onset-to-recanalization (min)</b>            | 252 [182 -331.5]     | 258 [217 – 315]      | 230 [166 – 342]      | 0.5        |
| <b>Endovascular procedure</b>                   |                      |                      |                      |            |
| <b>General Anesthesia</b>                       | 5 (15.6)             | 5 (33.3)†            | 0 (0)                | 0.02       |
| <b>Technique</b>                                |                      |                      |                      |            |
| Stent retriever                                 | 23 (71.9)            | 12 (75.0)            | 11 (68.8)            | 0.8        |
| Contact aspiration                              | 7 (21.9)             | 4 (25.0)             | 3 (18.8)             | 0.6        |

|                                                                                                                            |              |             |           |      |
|----------------------------------------------------------------------------------------------------------------------------|--------------|-------------|-----------|------|
| Combined technique                                                                                                         | 14 (43.8)    | 7 (43.8)    | 7 (43.8)  | 0.9  |
| <b>Number of passes</b>                                                                                                    | 2 [1 – 3]    | 3 [2 – 4]   | 2 [1 – 3] | 0.07 |
| <b>Number of passes before perforation†</b>                                                                                | 1 [0 – 1.75] | 1 [0.8 – 2] | 1 [0 – 1] | 0.3  |
| <b>Site of perforation</b>                                                                                                 |              |             |           | 0.5  |
| Intracranial ICA                                                                                                           | 2 (6.3)      | 2 (13.3)    | 0 (0)     |      |
| M1                                                                                                                         | 7 (21.9)     | 4 (25.0)    | 3 (21.4)  |      |
| M2                                                                                                                         | 18 (56.3)    | 9 (56.3)    | 9 (64.3)  |      |
| ACA                                                                                                                        | 3 (9.4)      | 1 (6.3)     | 2 (14.3)  |      |
| <b>Cause of perforation</b>                                                                                                |              |             |           | 0.02 |
| Microwire                                                                                                                  | 14 (43.8)    | 5 (31.3)    | 9 (56.3)  |      |
| Micro-catheter                                                                                                             | 9 (28.1)     | 8 (50.0)    | 1 (6.3)   |      |
| Unknown                                                                                                                    | 9 (28.1)     | 3 (18.8)    | 6 (37.5)  |      |
| <b>Rescue therapy</b>                                                                                                      |              |             |           | 0.2  |
| Vessel occlusion                                                                                                           | 5 (15.6)     | 4 (25.0)    | 1 (6.3)   |      |
| Inflation of intracranial balloon                                                                                          | 3 (9.4)      | 1 (6.3)     | 0 (0)     |      |
| Microcatheter trapping                                                                                                     | 1 (3.1)      | 2 (12.5)    | 1 (6.3)   |      |
| No specific therapy                                                                                                        | 23 (71.9)    | 9 (56.3)    | 14 (87.5) |      |
| †Three patients were intubated before starting EVT and two patients were converted to GA during EVT.                       |              |             |           |      |
| ‡ a pass is defined as an attempt of recanalization using device (stent-retriever, contact aspiration or combined therapy) |              |             |           |      |

**Supplemental Table I:** Description and outcomes of 29 patients for whom complete angiographic studies were available

|                                                             | <b>Number of patients<br/>(n=29)</b> | <b>mRS at 90 days<br/>(median, IQR)</b> | <b>Death at 90 days<br/>(n, %)</b> |
|-------------------------------------------------------------|--------------------------------------|-----------------------------------------|------------------------------------|
| Perforation identified only on microcatheter injection      | 16 (55.2%)                           | 5 [2-6]                                 | 7 (46.7%)                          |
| Perforation identified only on ICA injection                | 13 (44.8%)                           | 4 [1-6]                                 | 4 (30.8%)                          |
| Perforation viewed on multiple injections                   | 13 (44.8%)                           | 4[1-6]                                  | 5 (38.5%)                          |
| Number of runs before hemostatic intervention (median, IQR) | 2[1.5-3]                             | -                                       | -                                  |
| Number of runs before spontaneous resolution (median, IQR)  | 1[1-2]                               | -                                       | -                                  |

ICA: internal carotid artery, mRS: modified Rankin scale

**Supplemental Table II: Results of systematic review**

| Study N°ref | Type of study | Number of patients | NIHSS Median [IQR] | Clot location                                   | IV tPA               | General anesthesia | tools using during EVT                    | Site of perforation                                                            | Perforation cause                                  | Rescue therapy                                                                                                                  | mTICI                       | mRS at 3 months | Death |
|-------------|---------------|--------------------|--------------------|-------------------------------------------------|----------------------|--------------------|-------------------------------------------|--------------------------------------------------------------------------------|----------------------------------------------------|---------------------------------------------------------------------------------------------------------------------------------|-----------------------------|-----------------|-------|
| Ref17       | Case report   | 1                  | 16                 | M1                                              | N                    | Y                  | Aspiration                                | M1                                                                             | Microcatheter                                      | Procedure was aborted                                                                                                           | 0                           | 6               | 1     |
| Ref23       | Cohort study  | 1                  | 12                 | M1                                              | -                    | -                  | SR                                        | M2                                                                             | -                                                  | Therapeutic occlusion (coils)                                                                                                   | 0                           | 6               | 1     |
| Ref11       | Cohort study  | 1                  | 35                 | ICA                                             | -                    | -                  | SR                                        | -                                                                              | Microwire                                          | NA                                                                                                                              | 2a                          | 6               | 1     |
| Ref24       | Case report   | 5                  | 13 [10-14]         | M1 → 1<br>Tandem → 3<br>Unknown → 1             | Y → 2<br>Unknown → 3 | -                  | SR                                        | M1 → 4<br>Unknown → 1                                                          | -                                                  | -                                                                                                                               | 0 → 1<br>2a → 1<br>2b/3 → 3 | 4 [4-6]         | 2/5   |
| Ref19       | Cohort study  | 1                  | NA                 | ICA                                             | -                    | -                  | SR                                        | -                                                                              | -                                                  | -                                                                                                                               | -                           | 1               | 0     |
| Ref27       | Cohort study  | 2                  | 15.5 [13.75-17.25] | M1 → 1<br>Tandem → 1                            | -                    | -                  | SR                                        | -                                                                              | -                                                  | -                                                                                                                               | 2b/3                        | 1.5 [1.25-1.75] | 0     |
| Ref12       | Cohort study  | 2                  | 16.5 [13.75-19.25] | ICA → 1<br>M2 → 1                               | Y → 1<br>N → 1       | -                  | Aspiration                                | M2 → 2                                                                         | Microcatheter → 1<br>Microwire → 1                 | watchful waiting → 1<br>Therapeutic occlusion (glue) → 1                                                                        | 0 → 1<br>2b → 1             | 5 [4.5-5.5]     | 1/2   |
| Ref5        | Cohort study  | 16                 | 17 [15-23]         | ICA → 3<br>M1 → 4<br>M2 → 5<br>M3 → 1<br>BA → 3 | Y → 5<br>N → 11      | Y → 6<br>N → 10    | SR → 15<br>Aspiration → 9<br>Combined → 1 | M1 → 3<br>M2 → 6<br>M3 → 2<br>ACA → 1<br>ICA → 1<br>P1/P2 → 2<br>Vertebral → 1 | Microcatheter → 1<br>Microwire → 3<br>Unknown → 12 | watchful waiting → 1<br>Procedure was aborted → 7<br>Inflation of intracranial balloon → 8<br>Therapeutic occlusion (coils) → 1 | 0 → 6<br>2a → 6<br>2b/3 → 4 | 6 [3.5-6]       | 9/16  |
| Ref13       | Case report   | 3                  | 11 [11-11.5]       | M1 → 2<br>BA → 1                                | -                    | Y                  | SR → 2<br>Aspiration → 1                  | M3 → 1<br>P1 → 1<br>Unknown → 1                                                | Microcatheter → 1<br>Unknown → 2                   | Inflation of intracranial balloon → 2<br>Therapeutic occlusion (glue) → 1                                                       | 0 → 1<br>2a → 1<br>2b/3 → 1 | 6               | 1/2   |
| Ref14       | Cohort study  | 1                  | 19                 | M1 → 1                                          | N                    | -                  | SR                                        | -                                                                              | Microwire                                          | -                                                                                                                               | 3                           | 6               | 1     |
| Ref22       | Case report   | 1                  | 15                 | Tandem → 1                                      | -                    | -                  | None                                      | ICA                                                                            | Contrast injection                                 | Therapeutic occlusion (coils)                                                                                                   | 0                           | 6               | 1     |

|                                                                                                                               |              |    |                  |                           |                |                      |                                            |                                         |                                                    |                                                                                                             |                        |                 |       |
|-------------------------------------------------------------------------------------------------------------------------------|--------------|----|------------------|---------------------------|----------------|----------------------|--------------------------------------------|-----------------------------------------|----------------------------------------------------|-------------------------------------------------------------------------------------------------------------|------------------------|-----------------|-------|
| <b>Ref15</b>                                                                                                                  | Cohort study | 1  | -                | -                         | -              | -                    | -                                          | -                                       | Microwire                                          | -                                                                                                           | 3                      | 6               | 1     |
| <b>Ref16</b>                                                                                                                  | Case report  | 2  | 17 [16-18]       | M1 → 1<br>BA → 1          | Y → 1<br>N → 1 | Y → 1<br>Unknown → 1 | SR                                         | P1 (thalamoperforating) → 1<br>M2 → 1   | Microwire                                          | Therapeutic occlusion (glue) → 1<br>Therapeutic occlusion (glue) → 1                                        | 2b/3                   | 1.5 [1.25-1.75] | 0     |
| <b>Our study</b>                                                                                                              | Cohort study | 32 | 19.5 [15 – 24.8] | ICA → 10<br>M1 or M2 → 22 | Y → 19         | Y → 5                | SR → 23<br>Aspiration → 7<br>Combined → 14 | M1 → 7<br>M2 → 18<br>ACA → 3<br>ICA → 2 | Microwire → 14<br>Microcatheter → 9<br>Unknown → 9 | watchful waiting → 23<br>Inflation of intracranial balloon → 3<br>Therapeutic occlusion (coils or glue) → 5 | < 2b → 16<br>≥ 2b → 16 | 4 [2 – 6]       | 11/32 |
| SR: Stent-Retriever; ICA: internal carotid artery; M1/M2/M3: different segment of middle cerebral artery; BA: basilar artery. |              |    |                  |                           |                |                      |                                            |                                         |                                                    |                                                                                                             |                        |                 |       |
